# Supplementary material
Source: PubMed Central journal article supplement (PMC5505622)
Supplement: NIHMS871567-supplement-Supplemental_Table.pdf [file NIHMS871567-supplement-Supplemental_Table.pdf]

Ward *et al.* Supplemental Table 1

| <b>primer name</b>  | <b>sequence 5' - 3' forward</b> | <b>sequence 5' - 3' reverse</b> | <b>Annealing temp</b> |
|---------------------|---------------------------------|---------------------------------|-----------------------|
| mBmi1 ChIP          | ACGCGAGTCTGAAATCATAATC          | GCCGAGCCGTATTATTCTG             | 56                    |
| mNestin ChIP        | AAGTTCCAGGTGAGGAGGGT            | CCACCCCTTTCCTGAAGGTC            | 56                    |
| mSox2 ChIP          | CCAAGATGCACAACCTCGGAGA          | TTCTCGGTCTCGGACAAAAGT           | 56                    |
| mSox9 ChIP          | GGAAGTGCCTGGAAACTTC             | AGGGAAAACAGAGAACGAAAC           | 56                    |
|                     |                                 |                                 |                       |
| mCXCR4 qPCR         | ACCACCACGGCTGTAGAGCGA           | TCCCGGAAGCAGGGTTCCTT            | 56                    |
| mCXCR7 qPCR         | ACAGGCTACGACACGCACTGC           | CTCCCCCATGGGCCACTGGT            | 56                    |
| mSox9 qPCR          | TTCTGTGGGAGCGACAACCTT           | CTCTAAACCCGGGGAAGGC             | 56                    |
| mSox2 qPCR          | ACAACCTCCATGACCAGCTCGCAGAC      | GCCCTGGAGTGGGAGGAAGAGGTAA       | 56                    |
| mBmi1 qPCR          | CGCTTGCTCGCATTCATTTT            | AGTACCCTCCACACAGGACA            | 56                    |
| mNestin qPCR        | CGGGAGAGTCGCTTAGAGGT            | ACAGCCAGCTGGAACCTTTC            | 56                    |
| mNanog qPCR         | GCAGGACCTACCCTTTAAATC           | GAAGTCAGAAGGAAGTGAGC            | 62                    |
|                     |                                 |                                 |                       |
| mSmo amplification  | CCTGGCTGTGGCTCAGGT              | ATCATCACTGTGCCAGTCAACC          | 71                    |
| mSmo sequencing     | TACAAGAACTATCGGTACCGTGCTG       | GCAGGGTGGCCTTGGTC               |                       |
|                     |                                 |                                 |                       |
| mSufu amplification | GGCCTTTGCTTCACTCTTTC            | GGGAGAATGGACACTTTGA             | 58                    |
| mSufu sequencing1   | CATCTACGGAGAGTGTCCGCC           | TCTCAGGCCAGCTGTACTCT            |                       |
| mSufu sequencing2   | ACAGGAACATGGGGAGTCCT            | CCCCTTAGGCAGAGAGGGAT            |                       |
| mSufu sequencing3   | GGACACCCTTTGGGGTAGTG            | AGATGCTCCGGCTATCCTCT            |                       |
| mSufu sequencing4   | AGAGGATAGCCGGAGCATCT            | CACTACCCCAAAGGGTGTCC            |                       |
